# Supplementary material for: The relationship between root hydraulics and scion vigour across Vitis rootstocks: what role do root aquaporins play?
Source: PubMed Central journal article supplement — J Exp Bot. 2012 Nov 8;63(18):6445–55. doi: 10.1093/jxb/ers312 (PMC3504504; doi:10.1093/jxb/ers312), 2012-11-08
Supplement: supp_ers312_jexbot078287_file001.pdf [file supp_ers312_jexbot078287_file001.pdf]

**TITLE:** The relationship between root hydraulics and scion vigor across *Vitis* rootstocks: What role do root aquaporins play?

Gambetta GA<sup>2</sup>, Manuck CM<sup>1</sup>, Drucker ST<sup>2</sup>, Shaghasi T<sup>2</sup>, Fort K<sup>2</sup>, Matthews MA<sup>2</sup>, Walker MA<sup>2</sup>, McElrone AJ<sup>1,2,3</sup>

Determination of  $L_p$ , using osmotic pressure gradients

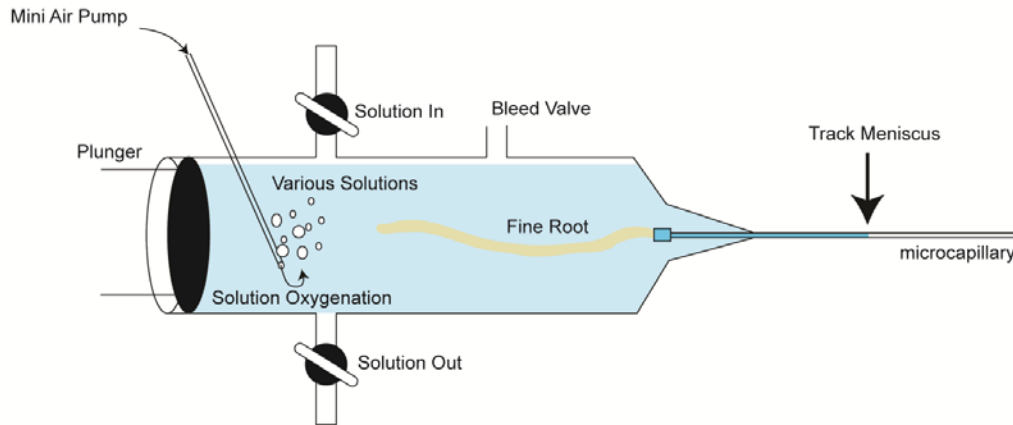

Determination of  $L_p$ , using hydrostatic pressure gradients

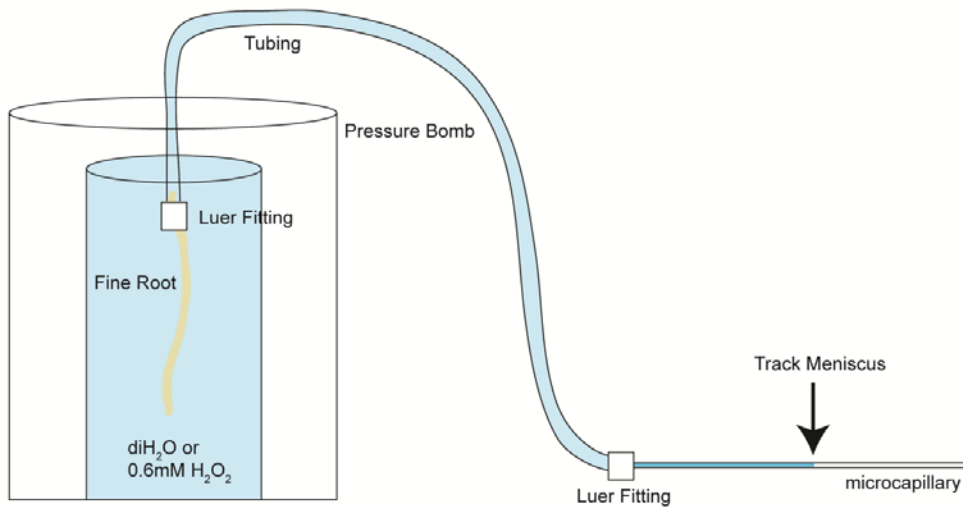

Supplemental Figure 1. Experimental set-up for the determination of  $L_p$  with osmotic (top) and hydrostatic pressure gradients (bottom). The custom made chamber for osmotic measurements was constructed out of a large disposable syringe in which two valves were glued in order to change solutions. A bleed valve was installed and a fine tube connected to a small aquarium pump to oxygenate the solution. The tip of the syringe was modified to perfectly fit the 500 $\mu$ m capillary without leakage. Flow was quantified via the movement of the air-water meniscus in the capillary.
